# Supplementary material for: Tuning the moisture stability of metal–organic frameworks by incorporating hydrophobic functional groups at different positions of ligands
Source: Royal Society of Chemistry journal article supplement (doi:10.1039/c1cc11752a), 2011-01-01
Supplement: c1cc11752a.pdf [file c1cc11752a.pdf]

## Supporting Information

### **Tuning the Moisture Stability of Metal-Organic Frameworks by Incorporating Hydrophobic Functional Groups at Different Positions of Ligands**

Deyun Ma, Yingwei Li,\* and Zhong Li

*School of Chemistry and Chemical Engineering, South China University of Technology,  
Guangzhou 510640, China.*

E-mail: liyw@scut.edu.cn

#### **Table of Contents**

|                                                          |    |
|----------------------------------------------------------|----|
| Experimental                                             | 2  |
| Scheme S1                                                | 6  |
| Crystal data of SCUTC-18 and SCUTC-19 (Tables S1 and S2) | 7  |
| Figures S1-S16                                           | 9  |
| Checkcif reports for SCUTC-18 and SCUTC-19               | 18 |

## Experimental

### 1. Preparation

All materials and solvents were obtained from commercial suppliers (Sigma-Aldrich, Alfa Aesar, and others) and used without further purification.

#### 1.1. Synthesis of $P^2$ and $P^3$ ligands

The preparations of 2,2'-dimethyl-4,4'-bipyridine ( $P^2$ ) and 3,3'-dimethyl-4,4'-bipyridine ( $P^3$ ) were carried out according to the reported procedures.<sup>[1]</sup>

#### 1.2. Synthesis of $MOF-508 \cdot (DMF) \cdot (H_2O)_2$ ( $[Zn_2(BDC)_2(P^1)] \cdot (DMF) \cdot (H_2O)_2$ )

A mixture of  $Zn(NO_3)_2 \cdot 6H_2O$  (89.1 mg, 0.3 mmol),  $H_2BDC$  (52.8 mg, 0.3 mmol), 4,4'-bipyridine (23.4 mg, 0.15 mmol) was suspended in DMF (15 mL) and heated to 120 °C for 48 h in a 23 mL Teflon-lined stainless-steel autoclave, followed by cooling to room temperature at 2 °C h<sup>-1</sup> to yield colorless block-shaped single crystals of  $MOF-508 \cdot (DMF) \cdot (H_2O)_2$  (yield: 50.1%, based on Zn). Elemental analysis (%) calcd for  $C_{29}H_{27}Zn_2N_3O_{11}$  (723.0), C, 48.13; H, 3.73; N, 5.81. Found: C, 48.11; H, 3.77; N, 5.78. Main IR frequencies (KBr, cm<sup>-1</sup>): 3386(s) (O-H (water)), 1654(m) (C=O (DMF)), 1579(vs), 1502(w), 1383(vs), 1190(w), 1148(w), 1110(w), 1081(w), 1013(w), 883(w), 853(w), 828(w), 745(s), 652(w), 572(w), 513(w).

#### 1.3. Synthesis of $SCUTC-18 \cdot (DMF)_2 \cdot (H_2O)$ ( $[Zn_2(BDC)_2(P^2)] \cdot (DMF)_2 \cdot (H_2O)$ )

SCUTC-18 was prepared by using the same procedures as those for MOF-508 except that  $P^1$  was replaced by 2,2'-dimethyl-4,4'-bipyridine (27.6 mg, 0.15 mmol). Yield 55.4% (based on Zn). Elemental analysis (%) calcd for  $C_{34}H_{36}Zn_2N_4O_{11}$  (806.4), C, 50.62; H, 4.47; N, 6.95. Found: C, 50.58; H, 4.50; N, 6.96. Main IR frequencies (KBr, cm<sup>-1</sup>): 3438(s) (O-H (water)), 2935(w) (C<sub>methyl</sub>-H of  $P^2$ ), 1659(m) (C=O (DMF)), 1578(s), 1503(w), 1389(s), 1089(m), 1150(w), 1100(w), 1058(w), 1015(w), 887(w), 823(m), 748(s), 667(w), 545(w).

#### 1.4. Synthesis of $SCUTC-19 \cdot (DMF) \cdot (H_2O)_2$ ( $[Zn_2(BDC)_2(P^3)] \cdot (DMF) \cdot (H_2O)_2$ )

SCUTC-19 was prepared by using the same procedure as those for MOF-508 except that  $P^1$  was replaced by 3,3'-dimethyl-4,4'-bipyridine (27.6 mg, 0.15 mmol). Yield 53.4% (based on Zn). Elemental analysis (%) calcd for  $C_{31}H_{31}Zn_2N_3O_{11}$  (751.0), C, 49.53; H, 4.13; N, 5.59. Found: C, 49.50; H, 4.15; N, 5.61. Main IR frequencies (KBr,  $cm^{-1}$ ): 3435(s) (O-H (water)), 2951(w) ( $C_{methyl}-H$  of  $P^3$ ), 1657(m) (C=O (DMF)), 1578(vs), 1502(vs), 1387(s), 1150(w), 1108(w), 1015(w), 886(w), 818(w), 746(s), 661(w), 517(w).

*1.5. Preparation of fully desolvated MOF508, SCUTC-18 and SCUTC-19 ( $[Zn_2(BDC)_2(P)]$ ,  $P = P^1, P^2, \text{ or } P^3$ )*

The resultant crystalline material was immersed in DMF for 24 h and then sequentially in chloroform for three 24 h periods. Finally, the compound was dried under vacuum for 12 h at 120 °C to fully remove the solvent. Elemental analysis calcd (%) for  $Zn_2(BDC)_2(P)$  (615.04 for MOF-508, 643.04 for SCUTC-18 and SCUTC-19): C 50.73%, H 2.60%, N 4.55% for MOF-508, C 52.25%, H 3.11%, N 4.55% for SCUTC-18 and SCUTC-19; found: C 50.76%, H 2.56%, N 4.56% for MOF-508, C 52.28%, H 3.13%, N 4.52% for SCUTC-18 and C 52.27%, H 3.11%, N 4.53% for SCUTC-19.

## 2. Crystal structure determination

Single crystal X-ray diffraction analyses of complexes  $MOF-508 \cdot (DMF) \cdot (H_2O)_2$ ,  $SCUTC-18 \cdot (DMF)_2 \cdot (H_2O)$ , and  $SCUTC-19 \cdot (DMF) \cdot (H_2O)_2$  were performed on a Rigaku Mercury CCD diffractometer operated at 90 kV and 50 mA using Mo K $\alpha$  radiation ( $\lambda = 0.71073 \text{ \AA}$ ) at room temperature. The empirical absorption corrections were performed using the CrystalClear program.<sup>[2]</sup> The structures were solved by direct methods and refined on  $F^2$  by full-matrix least squares technique using the SHELX-97 program package.<sup>[3]</sup> All non-hydrogen atoms were refined with anisotropic displacement parameters. Hydrogen atoms attached to carbon were placed in geometrically idealized positions and refined using a riding model. The routine SQUEEZE (PLATON)<sup>[4]</sup> was applied to the structures in order to remove

diffuse electron density associated with badly disordered water and DMF molecules. One of the 2-methyl-byridine ring of P<sup>2</sup> in SCUTC-18 is disordered and they are split into two sets of positions, with occupancy ratios of 0.470(5):0.530(5). Due to the significant overlap of the disordered atoms the following restraints were applied: the ring (C22 C23 C24 C25 C26 N2 C27) and their disordered counterparts were each restrained to be flat and their equivalent bond distances were restrained to be the same within a standard deviation of 0.01 Å. The crystallographic data for SCUTC-18 and SCUTC-19 are given in Table S1. Selected bond lengths and bond angles are given in Table S2.

Crystallographic data for MOF-508: triclinic *P*-1, with  $a = 10.894(2)$  Å,  $b = 10.955(2)$  Å,  $c = 14.102(3)$  Å,  $\alpha = 89.19(3)^\circ$ ,  $\beta = 88.64(3)^\circ$ ,  $\gamma = 81.33(3)^\circ$ ,  $V = 1663.2(6)$  Å<sup>3</sup>,  $Z = 2$ ,  $\mu(\text{Mo Ka}) = 1.482\text{mm}^{-1}$ ,  $\rho = 1.228$  g cm<sup>-3</sup>,  $T = 293$  K, reflection numbers collected = 13368, unique reflections ( $R_{\text{int}}$ ) = 5959 (0.0530),  $R_1 [I > 2\sigma(I)] = 0.0575$  and  $wR_2$  (all data) = 0.1443, GOF = 1.150.

Crystallographic data for SCUTC-18: Tetragonal *P*4<sub>3</sub>2<sub>1</sub>2, with  $a = 10.9288(4)$  Å,  $b = 10.9288(4)$  Å,  $c = 56.2967(2)$  Å,  $\alpha = \beta = \gamma = 90^\circ$ ,  $V = 6724.0(4)$  Å<sup>3</sup>,  $Z = 4$ ,  $\mu(\text{Mo Ka}) = 1.484\text{mm}^{-1}$ ,  $\rho = 1.410$  g cm<sup>-3</sup>,  $T = 293$  K, reflection numbers collected = 12976, unique reflections ( $R_{\text{int}}$ ) = 5626 (0.0437),  $R_1 [I > 2\sigma(I)] = 0.0518$  and  $wR_2$  (all data) = 0.1726, GOF = 1.073, Flack = 0.34(3). CCDC: 806376.

Crystallographic data for SCUTC-19: triclinic *P*-1, with  $a = 10.925(2)$  Å,  $b = 10.946(2)$  Å,  $c = 13.972(3)$  Å,  $\alpha = 95.19(3)^\circ$ ,  $\beta = 99.23(3)^\circ$ ,  $\gamma = 99.89(3)^\circ$ ,  $V = 1612.7(6)$  Å<sup>3</sup>,  $Z = 2$ ,  $\mu(\text{Mo Ka}) = 1.532\text{mm}^{-1}$ ,  $\rho = 1.325$  g cm<sup>-3</sup>,  $T = 293$  K, reflection numbers collected = 12733, unique reflections ( $R_{\text{int}}$ ) = 5736 (0.1001),  $R_1 [I > 2\sigma(I)] = 0.0759$  and  $wR_2$  (all data) = 0.1807, GOF = 0.941. CCDC: 806377.

### 3. Characterization

Elemental analyses for C, H, and N were carried out by using a Vario EL III Elemental Analyzer. Infrared (IR) spectra were recorded (4000-400  $\text{cm}^{-1}$ ) as KBr disks on a Bruker 1600 FTIR spectrometer. Thermogravimetry analyses (TGA) were performed on a simultaneous SDT thermal analyzer (STA449C, Netzsch) under a flow of  $\text{N}_2$  at a heating rate of 10  $^\circ\text{C}/\text{min}$  between ambient temperature and 800  $^\circ\text{C}$ . Powder XRD investigations were carried out on a Bruker AXS D8-Advanced diffractometer at 40 kV and 40 mA with  $\text{Cu K}\alpha$  ( $\lambda = 1.5406 \text{ \AA}$ ) radiation.

#### 4. Sorption measurements

The  $\text{N}_2$  isotherm was measured with an automatic volumetric adsorption apparatus (Micrometrics ASAP 2020) at 77 K. The sorption isotherm for toluene vapor was measured with an automatic gravimetric adsorption apparatus (IGA-003 series, Hiden Isochema Ltd.) at 298 K. Prior to measurements, the desolvated sample was further treated under high vacuum at 393 K overnight. The kinetic trap effects of water (or toluene) on the MOFs were monitored by TGA. Before measurements, the sample was treated at 473 K in flowing  $\text{N}_2$  overnight to remove the guest molecules. After cooling to room temperature, the sample was exposed to a  $\text{N}_2$  flow with water (or toluene) vapor until no weight change was observed. Then the sample was heated at a rate of 5  $^\circ\text{C}/\text{min}$  under a pure  $\text{N}_2$  flow.

#### References

- [1] P. Leighton, J. K. M. Sanders, *J. Chem. Soc. Perkin Trans. I* **1987**, 2385-2393.
- [2] Molecular Structure Corporation and Rigaku, **2000**. CrystalClear. Version 1.36. MSC, 9009 New Trails Drive, The Woodlands, TX 77381-5209, USA, and Rigaku Corporation, 3-9-12 Akishima, Tokyo, Japan.
- [3] G. M. Sheldrick, *Acta Cryst.* **2008**, A64, 112-122.
- [4] A. L. Spek, *PLATON, A Multipurpose Crystallographic Tool*; Utrecht University: Utrecht, The Netherlands, **2005**.

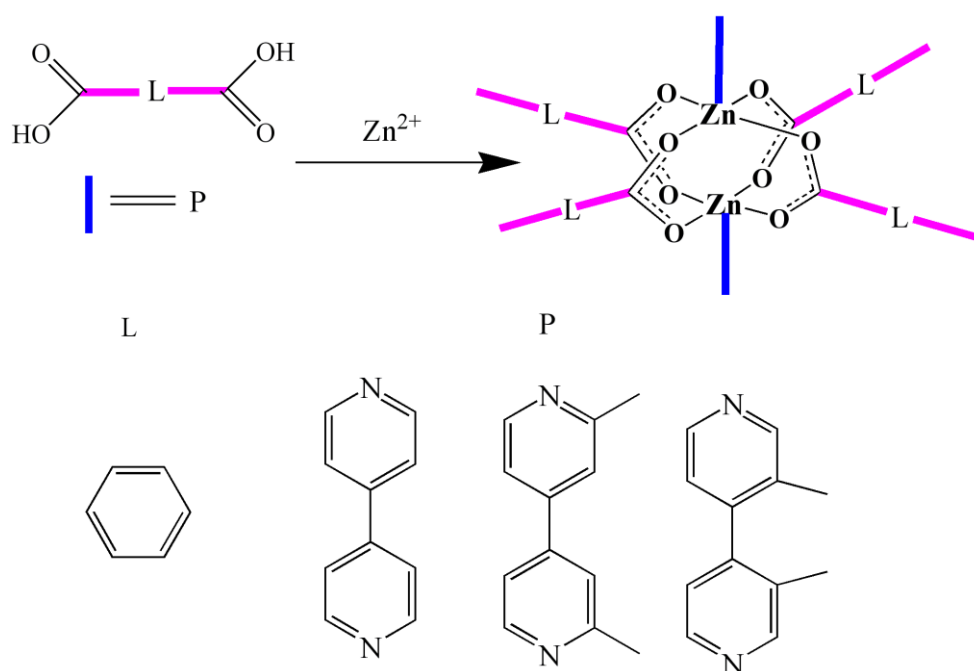

**Scheme S1.** Schematic illustration of the self-assembly of paddle-wheel cluster  $\text{Zn}_2(\text{CO}_2)_4$  with bicarboxylate  $\text{L}(\text{COO})_2$  and bidentate pillar linkers P to construct 3D primitive cubic MOFs,  $\text{Zn}_2(\text{L}(\text{COO})_2)_2(\text{P})$ .

**Table S1.** Crystal data and structure refinement details of SCUTC-18 and SCUTC-19.

|                                                      | SCUTC-18                                                                       | SCUTC-19                                                                       |
|------------------------------------------------------|--------------------------------------------------------------------------------|--------------------------------------------------------------------------------|
| Empirical Formula                                    | C <sub>34</sub> H <sub>36</sub> Zn <sub>2</sub> N <sub>4</sub> O <sub>11</sub> | C <sub>31</sub> H <sub>31</sub> Zn <sub>2</sub> N <sub>3</sub> O <sub>11</sub> |
| Formula weight                                       | 806.4                                                                          | 751.0                                                                          |
| Crystal System                                       | Tetragonal                                                                     | Triclinic                                                                      |
| Space group                                          | <i>P4<sub>3</sub>2<sub>1</sub>2</i>                                            | <i>P-1</i>                                                                     |
| <i>a</i> (Å)                                         | 10.9288(4)                                                                     | 10.925(2)                                                                      |
| <i>b</i> (Å)                                         | 10.9288(4)                                                                     | 10.946(2)                                                                      |
| <i>c</i> (Å)                                         | 56.2967(2)                                                                     | 13.972(3)                                                                      |
| $\alpha$ (°)                                         | 90.00                                                                          | 95.20(3)                                                                       |
| $\beta$ (°)                                          | 90.00                                                                          | 99.23(3)                                                                       |
| $\gamma$ (°)                                         | 90.00                                                                          | 99.89(3)                                                                       |
| <i>V</i> (Å <sup>3</sup> )                           | 6724.0(4)                                                                      | 1612.7(5)                                                                      |
| <i>Z</i>                                             | 4                                                                              | 2                                                                              |
| <i>F</i> (000)                                       | 2597                                                                           | 652                                                                            |
| <i>D</i> <sub>calc</sub> (mg/cm <sup>3</sup> )       | 1.268                                                                          | 1.532                                                                          |
| Absorption coefficient (mm <sup>-1</sup> )           | 1.470                                                                          | 1.532                                                                          |
| GOF                                                  | 1.073                                                                          | 0.941                                                                          |
| Crystal size (mm)                                    | 0.30 × 0.25 × 0.21                                                             | 0.30 × 0.23 × 0.18                                                             |
| $\theta$ range for data collection (°)               | 3.01-25.20                                                                     | 3.03-25.20                                                                     |
| Limiting indices                                     | -6 ≤ <i>h</i> ≤ 12<br>-12 ≤ <i>k</i> ≤ 13<br>-67 ≤ <i>l</i> ≤ 67               | -11 ≤ <i>h</i> ≤ 13<br>-13 ≤ <i>k</i> ≤ 13<br>-16 ≤ <i>l</i> ≤ 16              |
| Reflections collected / unique                       | 12976/5626                                                                     | 12731/5736                                                                     |
| Completeness to $\theta = 26.99$                     | 98.70%                                                                         | 98.80%                                                                         |
| Data/restraints/parameters                           | 5626/395                                                                       | 5736/363                                                                       |
| Final <i>R</i> indices [ <i>I</i> > 2σ( <i>I</i> ) ] | <i>R</i> <sub>1</sub> = 0.0518, <i>wR</i> <sub>2</sub> = 0.1759                | <i>R</i> <sub>1</sub> = 0.0759, <i>wR</i> <sub>2</sub> = 0.2137                |
| <i>R</i> indices (all data)                          | <i>R</i> <sub>1</sub> = 0.0570, <i>wR</i> <sub>2</sub> = 0.1726                | <i>R</i> <sub>1</sub> = 0.1354, <i>wR</i> <sub>2</sub> = 0.1807                |

$$R = \frac{\sum (|F_o| - |F_c|)}{\sum |F_o|}$$

$$wR = \left[ \frac{\sum w(F_o^2 - F_c^2)^2}{\sum w(F_o^2)} \right]^{1/2}$$

**Table S2.** Selected bond distances (Å) and angles (°).

| <b>SCUTC-18</b>                               |            |                                             |            |
|-----------------------------------------------|------------|---------------------------------------------|------------|
| Zn(1)-O(3) <sup>i</sup>                       | 2.023(4)   | Zn(2)-O(6)                                  | 2.033(3)   |
| Zn(1)-O(1)                                    | 2.030(4)   | Zn(2)-O(8) <sup>ii</sup>                    | 2.042(4)   |
| Zn(1)-O(7) <sup>ii</sup>                      | 2.032(5)   | Zn(2)-O(4) <sup>i</sup>                     | 2.050(4)   |
| Zn(1)-O(5)                                    | 2.059(3)   | Zn(2)-O(2)                                  | 2.061(3)   |
| Zn(1)-N(2)                                    | 2.050(2)   | Zn(2)-N(1) <sup>iii</sup>                   | 2.084(4)   |
| O(3) <sup>i</sup> -Zn(1)-O(1)                 | 164.32(15) | O(3) <sup>i</sup> -Zn(1)-O(1) <sup>ii</sup> | 88.32(2)   |
| O(3) <sup>i</sup> -Zn(1)-O(5)                 | 88.81(2)   | O(7) <sup>ii</sup> -Zn(1)-N(2)              | 111.10(14) |
| N(2)-Zn(1)-O(5)                               | 98.04(13)  | O(1)-Zn(1)-N(2)                             | 96.62(14)  |
| O(6)-Zn(2)-O(8) <sup>ii</sup>                 | 162.88(14) | O(8) <sup>ii</sup> -Zn(2)-O(4) <sup>i</sup> | 86.69(2)   |
| O(6)-Zn(2)-O(2)                               | 88.95(2)   | O(8) <sup>ii</sup> -Zn(2)-O(2)              | 87.69(16)  |
| O(4) <sup>i</sup> -Zn(2)-O(2)                 | 149.17(14) | O(6)-Zn(2)-N(1) <sup>iii</sup>              | 96.11(15)  |
| O(8) <sup>ii</sup> -Zn(2)-N(1) <sup>iii</sup> | 100.99(15) | O(2)-Zn(2)-N(1) <sup>iii</sup>              | 98.35(15)  |
| <b>SCUTC-19</b>                               |            |                                             |            |
| Zn(1)-N(1)                                    | 2.039(6)   | Zn(2)-N(2) <sup>i</sup>                     | 2.054(6)   |
| Zn(1)-O(2)                                    | 2.027(5)   | Zn(2)-O(1)                                  | 2.034(6)   |
| Zn(1)-O(6)                                    | 2.083(6)   | Zn(2)-O(5)                                  | 2.023(5)   |
| Zn(1)-O(8) <sup>i</sup>                       | 2.053(5)   | Zn(2)-O(4)                                  | 2.010(5)   |
| Zn(1)-O(3) <sup>iv</sup>                      | 2.027(6)   | Zn(2)-O(7) <sup>i</sup>                     | 2.062(5)   |
| N(1)-Zn(1)-O(2)                               | 101.0(3)   | N(1)-Zn(1)-O(3) <sup>iv</sup>               | 97.5(3)    |
| O(2)-Zn(1)-O(3) <sup>iv</sup>                 | 161.2(2)   | O(2)-Zn(1)-O(8) <sup>i</sup>                | 90.1(2)    |
| O(3) <sup>iv</sup> -Zn(1)-O(8) <sup>i</sup>   | 87.1(2)    | O(2)-Zn(1)-O(6)                             | 87.2(2)    |
| O(3) <sup>iv</sup> -Zn(1)-O(6)                | 88.0(2)    | O(8) <sup>i</sup> -Zn(1)-O(6)               | 156.7(2)   |
| O(4) <sup>iv</sup> -Zn(2)-O(5)                | 90.9(2)    | O(4) <sup>iv</sup> -Zn(2)-N(2) <sup>v</sup> | 106.2(3)   |
| O(4) <sup>iv</sup> -Zn(2)-O(1)                | 157.1(2)   | O(5)-Zn(2)-O(1)                             | 86.9(2)    |
| N(2) <sup>v</sup> -Zn(2)-O(1)                 | 96.5(3)    | O(4) <sup>iv</sup> -Zn(2)-O(7) <sup>i</sup> | 86.8(2)    |
| O(5)-Zn(2)-O(7) <sup>i</sup>                  | 162.1(2)   | O(1)-Zn(2)-O(7) <sup>i</sup>                | 88.4(2)    |

Symmetry codes: i = -1+x, y, z; ii = x, -1+y, z; iii = 0.5-y, -0.5+x, -0.25+z; iv = x, 1+y, z; v = x, y, 1+z.



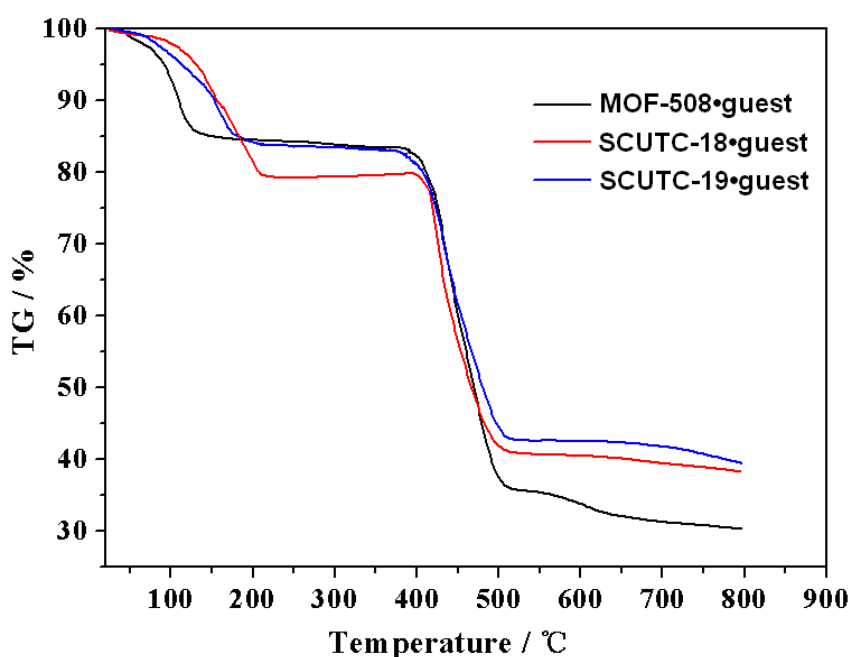

**Figure S1.** TGA curves for the as-synthesized compounds. MOF-508·(DMF)·(H<sub>2</sub>O)<sub>2</sub>: calcd weight loss (%) for DMF + 2H<sub>2</sub>O: 15.1; found: 15.0. SCUTC-18·(DMF)<sub>2</sub>·(H<sub>2</sub>O): calcd weight loss (%) for 2DMF + H<sub>2</sub>O: 20.4; found: 21.0. SCUTC-19·(DMF)·(H<sub>2</sub>O)<sub>2</sub>: calcd weight loss (%) for DMF + 2H<sub>2</sub>O: 14.6; found: 15.1.

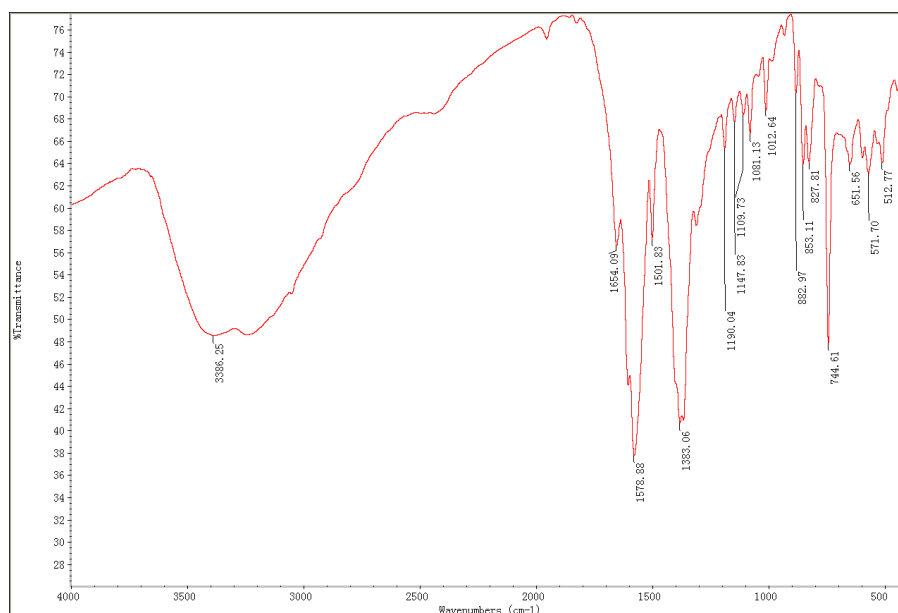

**Figure S2.** IR spectra of MOF-508·(DMF)·(H<sub>2</sub>O)<sub>2</sub>: 3386 cm<sup>-1</sup> (O-H<sub>water</sub>), 1654 cm<sup>-1</sup> (C=O<sub>DMF</sub>).

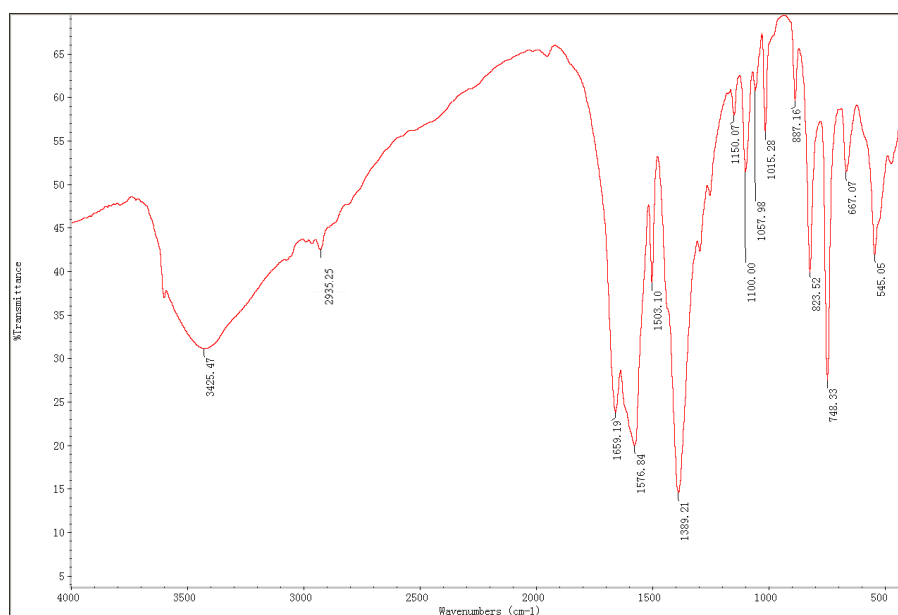

**Figure S3.** IR spectra of SCUTC-18·(DMF)<sub>2</sub>·(H<sub>2</sub>O): 3425 cm<sup>-1</sup> (O-H<sub>water</sub>), 1659 cm<sup>-1</sup> (C=O<sub>DMF</sub>), 2935 cm<sup>-1</sup> (C<sub>methyl</sub>-H of P<sup>2</sup>).

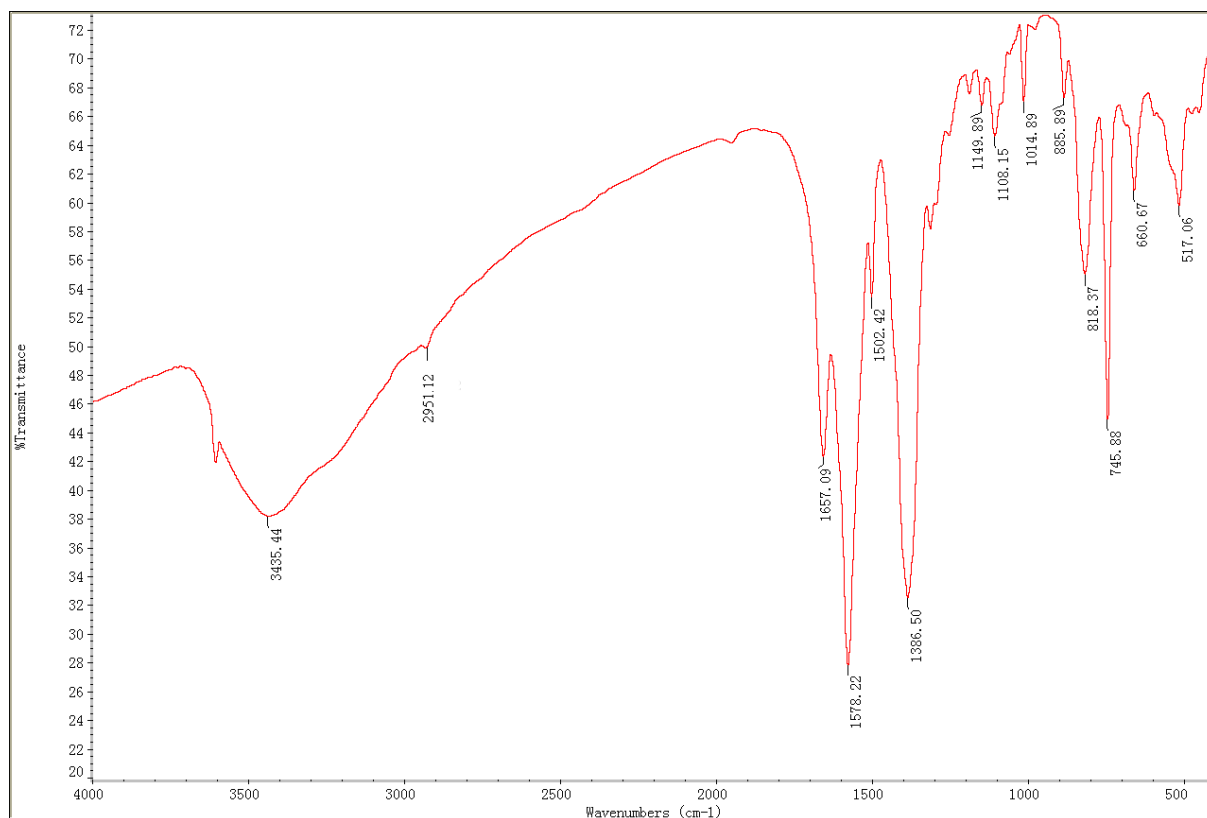

**Figure S4.** IR spectra of SCUTC-19·(DMF)·(H<sub>2</sub>O)<sub>2</sub>: 3435 cm<sup>-1</sup> (O-H<sub>water</sub>), 1657 cm<sup>-1</sup> (C=O<sub>DMF</sub>), 2951 cm<sup>-1</sup> (C<sub>methyl</sub>-H of P<sup>3</sup>).

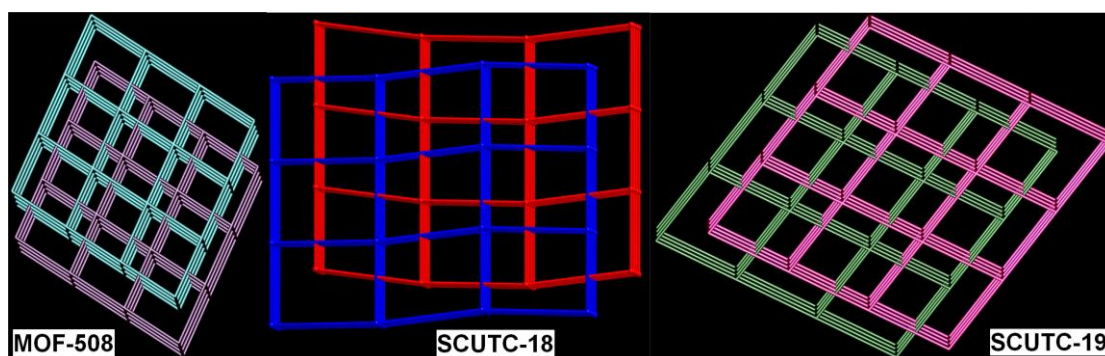

**Figure S5.** Showing the 2-fold interpenetration and remaining channels along the *c* axis.

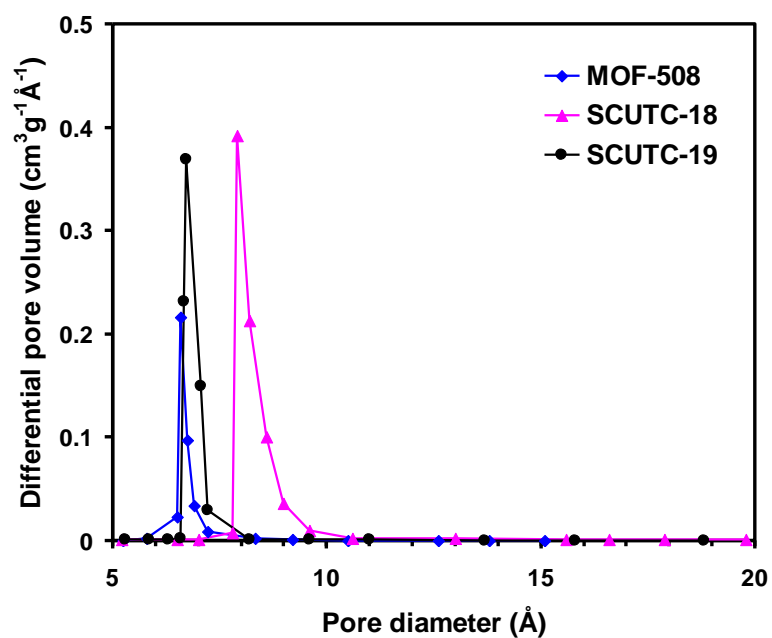

**Figure S6.** Micropore size distributions of MOF-508, SCUTC-18, and SCUTC-19.

(a)

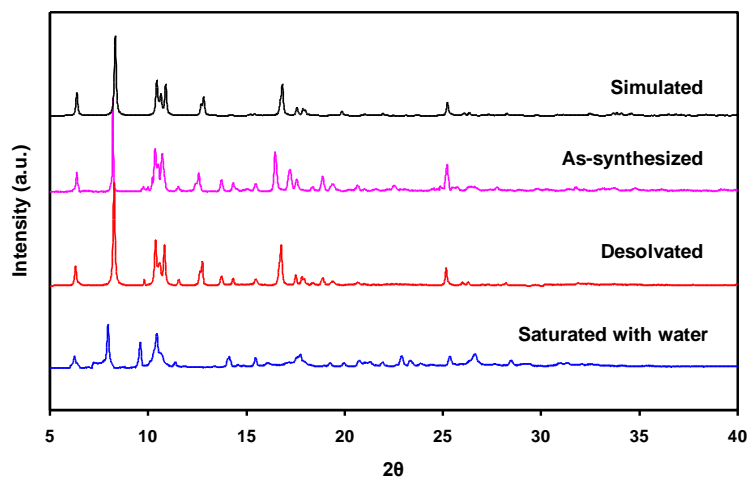

(b)

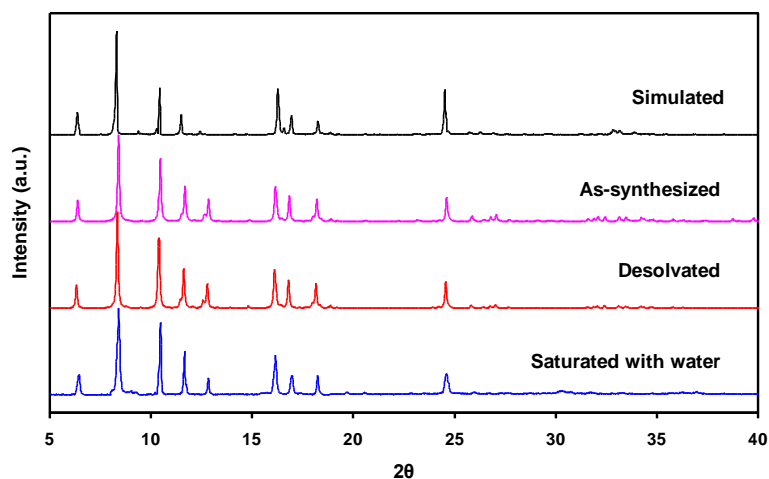

(c)

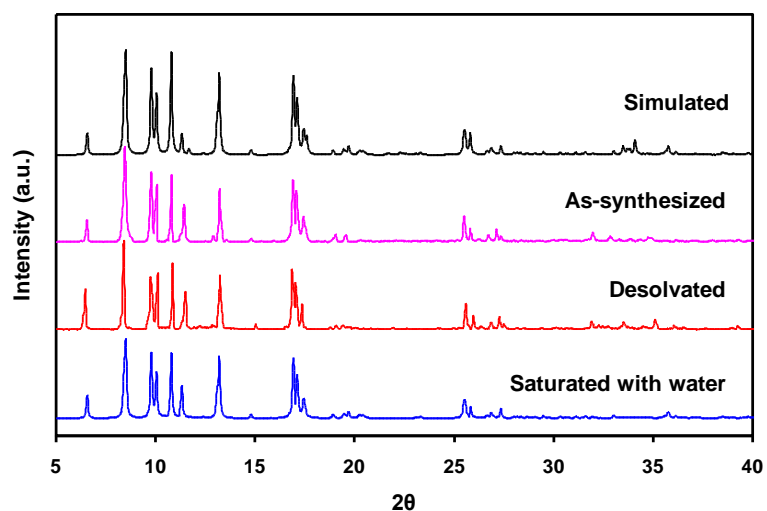

**Figure S7.** PXRD patterns of MOF-508 (a), SCUTC-18 (b), and SCUTC-19 (c). The desolvated samples were obtained by degassing the MOFs under vacuum at 473 K overnight. The MOFs saturated with water were obtained by using the same procedures for preparing the samples for TGA measurements (see Section 4 of the Experimental part of the ESI).

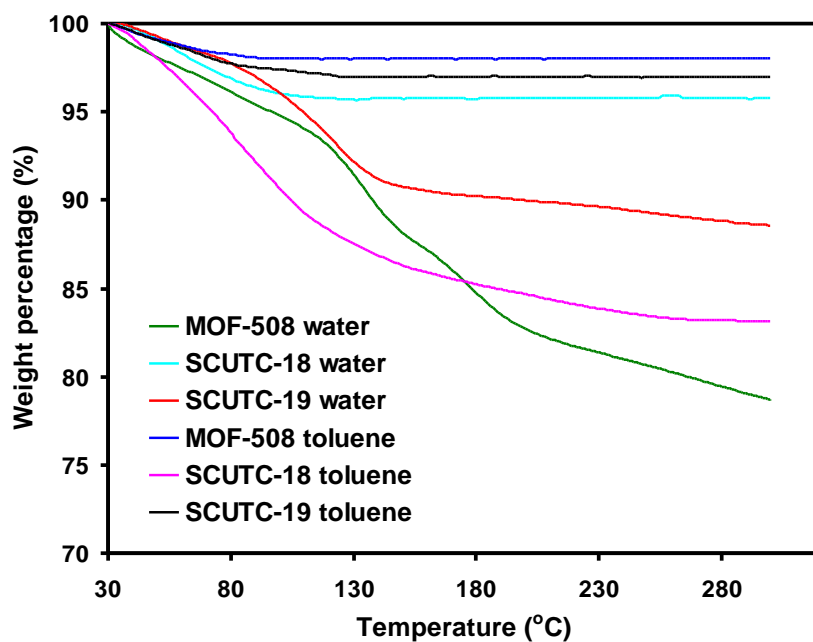

Figure S8. TGA of MOF-508, SCUTC-18, and SCUTC-19 with different absorbates.

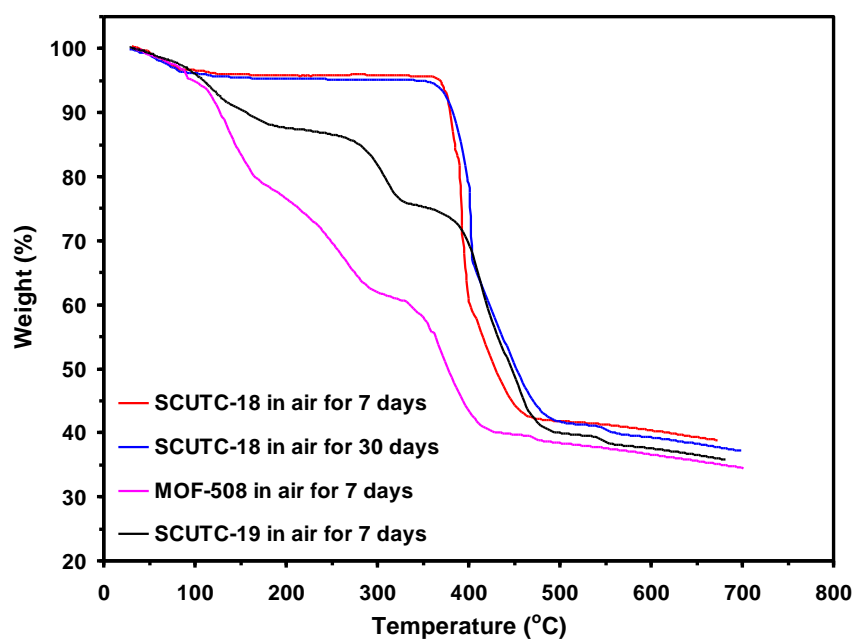

Figure S9. TGA of desolvated MOF-508, SCUTC-18, and SCUTC-19 after exposing to air for 7 or 30 days.

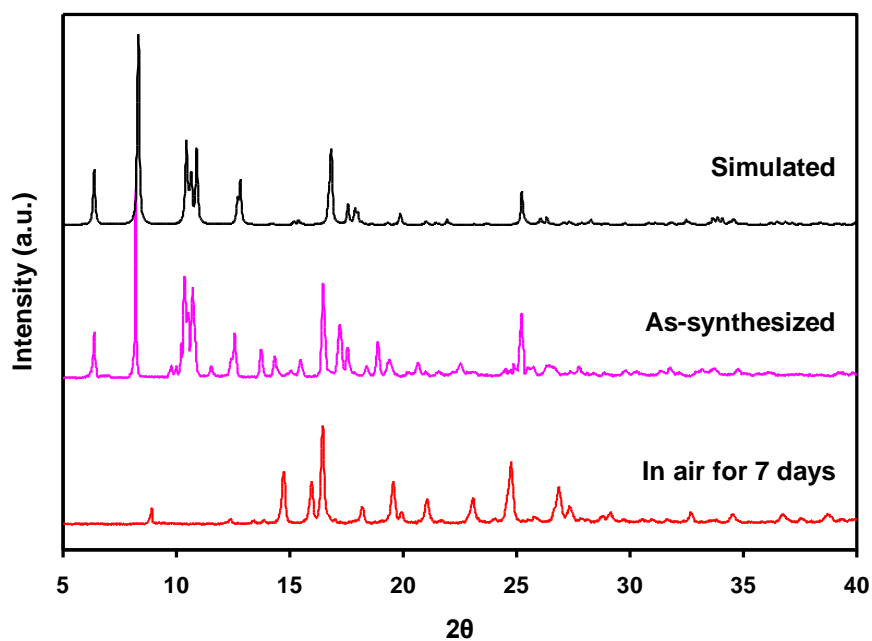

**Figure S10.** PXRD patterns of MOF-508 over a period of 7 days.

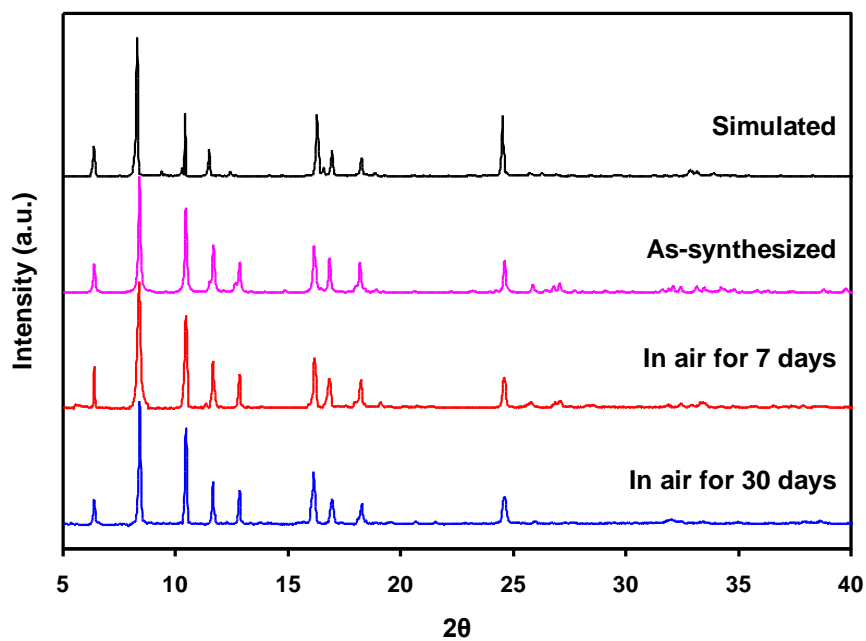

**Figure S11.** PXRD patterns of SCUTC-18 over a period of 30 days.

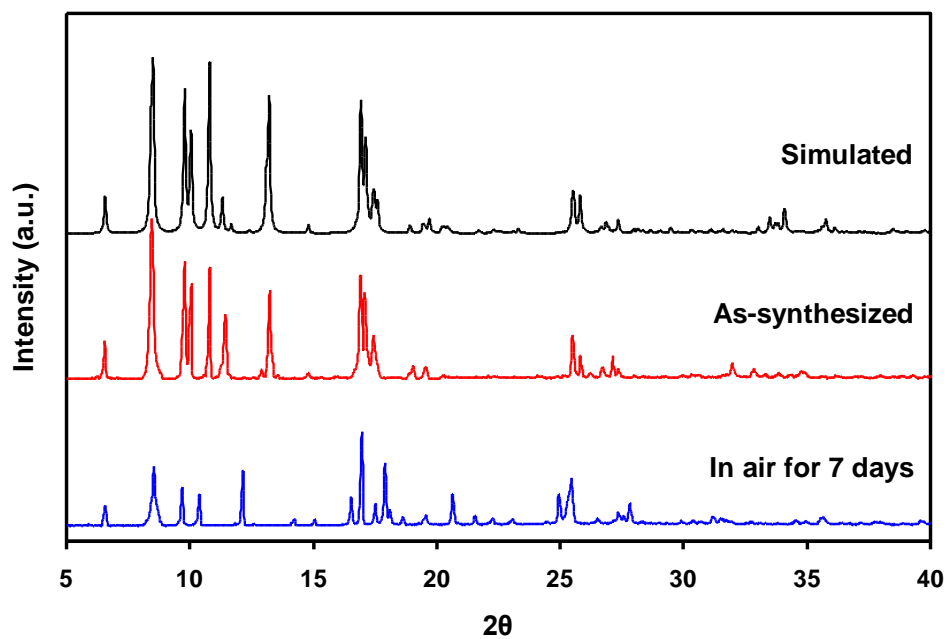

**Figure S12.** PXRD patterns of SCUTC-19 over a period of 7 days.

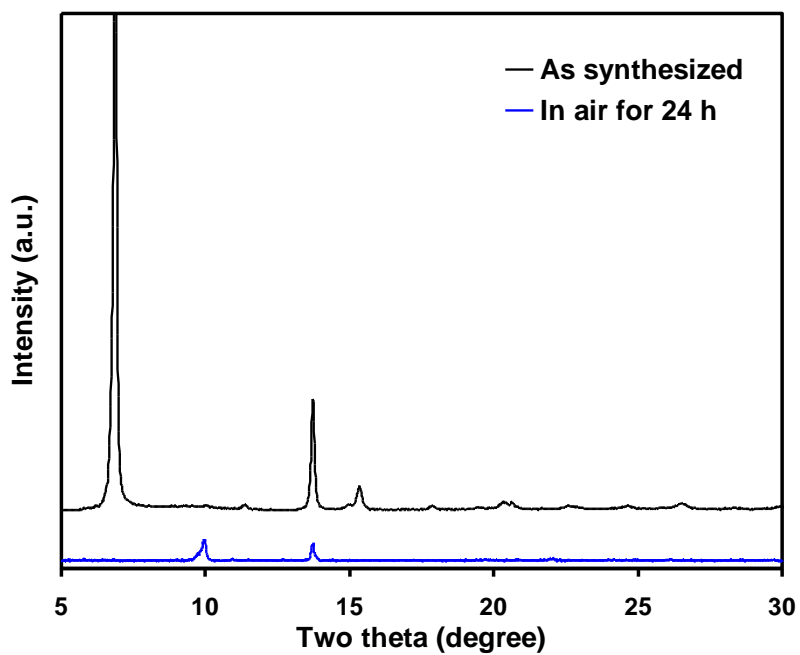

**Figure S13.** PXRD patterns of MTV-MOF-5-AF over a period of 24 h.

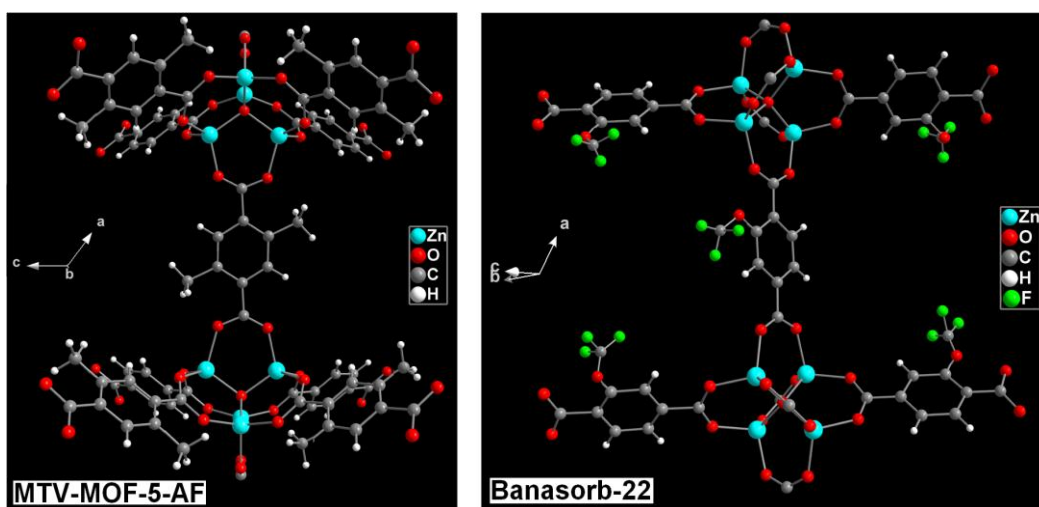

**Figure S14.** Views of the structures of MTV-MOF-5-AF and Banasorb-22.

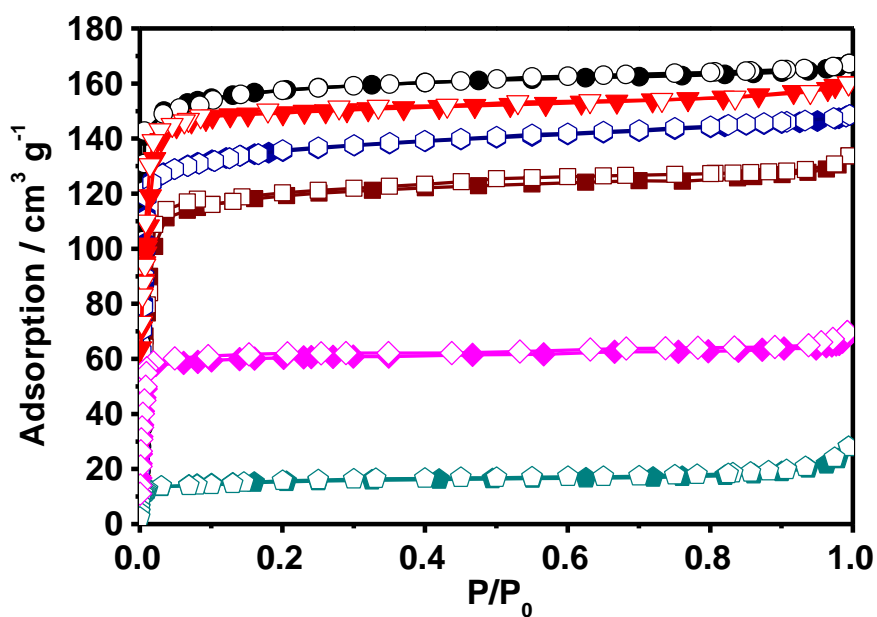

**Figure S15.**  $N_2$  isotherms for MOF-508, SCUTC-18, and SCUTC-19 before and after exposing to air. Circle: SCUTC-18 as synthesized; triangle: SCUTC-18 exposed to air; hexagon: SCUTC-19 as synthesized; square: MOF-508 as synthesized; rhombus: SCUTC-19 exposed to air; pentagon: MOF-508 exposed to air. Filled symbols: adsorption; open symbols: desorption.



### Calculation of isosteric heat of adsorption

The micropore filling of toluene vapor can be well described by the Dudinin-Radushkevich (DR) equation:

$$\ln W = \ln W_0 - (RT/\beta E_0)^2 (\ln(P_0/P))^2$$

in which  $W$  and  $W_0$  are the amount of adsorption at  $P/P_0$  and the saturated amount of adsorption, respectively.  $\beta E_0$  is the adsorption energy.

The DR plot has a linear relationship in the high relative pressure ( $P/P_0$ ) region, from which the value of  $\beta E_0$  can be deduced (Figure S14). Furthermore, the isosteric heat of adsorption,  $q_{st,\Phi=1/e}$ , at the fractional filling of  $1/e$  can be obtained by using  $q_{st,\Phi=1/e} = \Delta H_v + \beta E_0$ , where  $\Delta H_v$  is the heat of vaporization of the solvent.

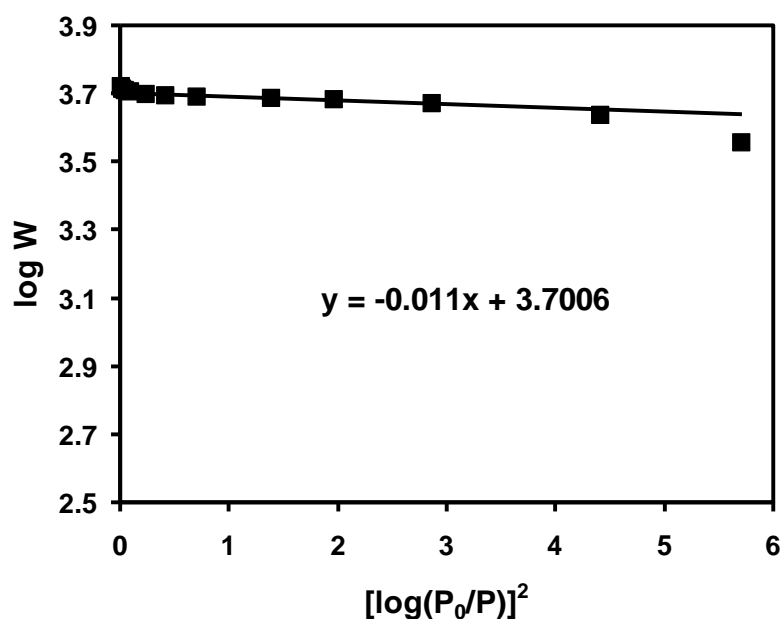

**Figure S16.** DR plot of toluene adsorption isotherm for SCUTC-18.

# checkCIF/PLATON report (basic structural check)

No syntax errors found.

Please wait while processing ....

[report](#)

[CIF dictionary](#)

[Interpreting this](#)

## Datablock: SCUTC-18

---

|                        |                                         |                                 |
|------------------------|-----------------------------------------|---------------------------------|
| Bond precision:        | C-C = 0.0070 Å                          | Wavelength=0.71073              |
| Cell:                  | a=10.9288(4) b=10.9288(4) c=56.2966(17) |                                 |
|                        | alpha=90 beta=90 gamma=90               |                                 |
| Temperature:           | 293 K                                   |                                 |
|                        | Calculated                              | Reported                        |
| Volume                 | 6723.99(10)                             | 6724.0(4)                       |
| Space group            | P 43 21 2                               | P 43 21 2                       |
| Hall group             | P 4nw 2abw                              | P 4nw 2abw                      |
| Moiety formula         | C28 H18.59 N2 O8 Zn2                    | C28 H18.59 N2 O8 Zn2            |
| Sum formula            | C28 H18.59 N2 O8 Zn2                    | C28 H18.59 N2 O8 Zn2            |
| Mr                     | 641.82                                  | 641.78                          |
| Dx, g cm <sup>-3</sup> | 1.268                                   | 1.268                           |
| Z                      | 8                                       | 8                               |
| Mu (mm <sup>-1</sup> ) | 1.470                                   | 1.470                           |
| F000                   | 2596.7                                  | 2597.0                          |
| F000'                  | 2602.34                                 |                                 |
| h, k, lmax             | 13, 13, 67                              | 12, 13, 67                      |
| Nref                   | 3631[ 6066]                             | 5626                            |
| Tmin, Tmax             | 0.650, 0.734                            | 0.662, 0.746                    |
| Tmin'                  | 0.637                                   |                                 |
| Correction method=     | MULTI-SCAN                              |                                 |
| Data completeness=     | 1.55/0.93                               | Theta(max)= 25.200              |
| R(reflections)=        | 0.0518( 4933)                           | wR2(reflections)= 0.1759( 5626) |
| S =                    | 1.073                                   | Npar= 395                       |

---

The following ALERTS were generated. Each ALERT has the format

[test-name\\_ALERT\\_alert-type\\_alert-level.](#)

Click on the hyperlinks for more details of the test.

---

 **Alert level A**

[PLAT602 ALERT 2 A](#) VERY LARGE Solvent Accessible VOID(S) in Structure !

---

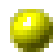

**Alert level C**

[STRVA01 ALERT 4 C](#) Flack test results are ambiguous.  
From the CIF: `_refine_ls_abs_structure_Flack` 0.340  
From the CIF: `_refine_ls_abs_structure_Flack_su` 0.030

[PLAT241 ALERT 2 C](#) Check High Ueq as Compared to Neighbors for 01

[PLAT241 ALERT 2 C](#) Check High Ueq as Compared to Neighbors for 05

[PLAT241 ALERT 2 C](#) Check High Ueq as Compared to Neighbors for 06

[PLAT242 ALERT 2 C](#) Check Low Ueq as Compared to Neighbors for Zn1

[PLAT242 ALERT 2 C](#) Check Low Ueq as Compared to Neighbors for Zn2

[PLAT341 ALERT 3 C](#) Low Bond Precision on C-C Bonds (x 1000) Ang .. 7

[PLAT366 ALERT 2 C](#) Short? C(sp?)-C(sp?) Bond C17 - C18 ... 1.39 Ang.

[PLAT366 ALERT 2 C](#) Short? C(sp?)-C(sp?) Bond C17 - C21 ... 1.37 Ang.

[PLAT033 ALERT 4 C](#) Flack x Parameter Value Deviates from Zero ..... 0.34

[PLAT068 ALERT 1 C](#) Reported F000 Differs from Calcd (or Missing)... ?

[PLAT152 ALERT 1 C](#) The Supplied and Calc. Volume s.u. Differ by ... - 30 Units

---

**Alert level G**

[REFLT03 ALERT 4 G](#) Please check that the estimate of the number of Friedel pairs is

correct. If it is not, please give the correct count in the `_publ_section_exptl_refinement` section of the submitted CIF.

|                                                     |         |
|-----------------------------------------------------|---------|
| From the CIF: <code>_diffrn_reflns_theta_max</code> | 25.20   |
| From the CIF: <code>_reflns_number_total</code>     | 5626    |
| Count of symmetry unique reflns                     | 3631    |
| Completeness ( <code>_total/calc</code> )           | 154.94% |
| TEST3: Check Friedels for noncentro structure       |         |
| Estimate of Friedel pairs measured                  | 1995    |
| Fraction of Friedel pairs measured                  | 0.549   |

Are heavy atom types Z>Si present yes

[PLAT072 ALERT 2 G](#) SHELXL First Parameter in WGHT Unusually Large.  
0.12

[PLAT083 ALERT 2 G](#) SHELXL Second Parameter in WGHT Unusually Large.  
5.52

[PLAT301 ALERT 3 G](#) Note: Main Residue Disorder .....  
14.00 Perc.

[PLAT860 ALERT 3 G](#) Note: Number of Least-Squares Restraints .....  
282

[PLAT199 ALERT 1 G](#) Check the Reported \_cell\_measurement\_temperature  
293 K

[PLAT200 ALERT 1 G](#) Check the Reported \_diffrn\_ambient\_temperature  
293 K

[PLAT811 ALERT 5 G](#) No ADDSYM Analysis: Too Many Excluded  
Atoms .... !

---

1 **ALERT level A** = In general: serious problem  
 0 **ALERT level B** = Potentially serious problem  
 12 **ALERT level C** = Check and explain  
 8 **ALERT level G** = General alerts; check

4 ALERT type 1 CIF construction/syntax error, inconsistent or missing data  
 10 ALERT type 2 Indicator that the structure model may be wrong or deficient  
 3 ALERT type 3 Indicator that the structure quality may be low  
 3 ALERT type 4 Improvement, methodology, query or suggestion  
 1 ALERT type 5 Informative message, check

## checkCIF/PLATON report (basic structural check)

No syntax errors found.  
 Please wait while processing ....  
[report](#)

[CIF dictionary](#)  
[Interpreting this](#)

### Datablock: SCUTC-19

---

|                 |                                                |                    |
|-----------------|------------------------------------------------|--------------------|
| Bond precision: | C-C = 0.0127 Å                                 | Wavelength=0.71073 |
| Cell:           | a=10.925 (2) b=10.946 (2) c=13.972 (3)         |                    |
|                 | alpha=95.20 (3) beta=99.23 (3) gamma=99.89 (3) |                    |
| Temperature:    | 293 K                                          |                    |

Calculated

Reported

|                        |                   |                                 |
|------------------------|-------------------|---------------------------------|
| Volume                 | 1612.7(6)         | 1612.7(5)                       |
| Space group            | P -1              | P-1                             |
| Hall group             | -P 1              | -P 1                            |
| Moiety formula         | C28 H20 N2 O8 Zn2 | C28 H20 N2 O8 Zn2               |
| Sum formula            | C28 H20 N2 O8 Zn2 | C28 H20 N2 O8 Zn2               |
| Mr                     | 643.24            | 643.20                          |
| Dx, g cm <sup>-3</sup> | 1.325             | 1.325                           |
| Z                      | 2                 | 2                               |
| Mu (mm <sup>-1</sup> ) | 1.532             | 1.532                           |
| F000                   | 652.0             | 652.0                           |
| F000'                  | 653.41            |                                 |
| h, k, lmax             | 13, 13, 16        | 13, 13, 16                      |
| Nref                   | 5805              | 5736                            |
| Tmin, Tmax             | 0.662, 0.759      | 0.765, 0.869                    |
| Tmin'                  | 0.625             |                                 |
| Correction method=     | MULTI-SCAN        |                                 |
| Data completeness=     | 0.988             | Theta(max)= 25.200              |
| R(reflections)=        | 0.0759( 2877)     | wR2(reflections)= 0.2137( 5736) |
| S =                    | 0.941             | Npar= 363                       |

---

The following ALERTS were generated. Each ALERT has the format  
[test-name\\_ALERT\\_alert-type\\_alert-level](#).  
Click on the hyperlinks for more details of the test.

---

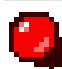

### Alert level A

[PLAT602 ALERT 2 A](#) VERY LARGE Solvent Accessible VOID(S) in  
Structure !

---

### Alert level C

[PLAT241 ALERT 2 C](#) Check High Ueq as Compared to Neighbors for  
C20

[PLAT241 ALERT 2 C](#) Check High Ueq as Compared to Neighbors for  
C23

[PLAT241 ALERT 2 C](#) Check High Ueq as Compared to Neighbors for  
C24

[PLAT242 ALERT 2 C](#) Check Low Ueq as Compared to Neighbors for  
N2

[PLAT242 ALERT 2 C](#) Check Low Ueq as Compared to Neighbors for  
C22

[PLAT341 ALERT 3 C](#) Low Bond Precision on C-C Bonds (x 1000) Ang ..  
13

[PLAT369 ALERT 2 C](#) Long C(sp<sup>2</sup>)-C(sp<sup>2</sup>) Bond C1 - C2 ...  
1.53 Ang.  
[PLAT234 ALERT 4 C](#) Large Hirshfeld Difference O1 -- C1 ..  
0.17 Ang.  
[PLAT234 ALERT 4 C](#) Large Hirshfeld Difference C3 -- C4 ..  
0.17 Ang.

---

#### Alert level G

[PLAT072 ALERT 2 G](#) SHELXL First Parameter in WGHT Unusually Large.  
0.10  
[PLAT154 ALERT 1 G](#) The su's on the Cell Angles are Equal (x 10000)  
3000 Deg.  
[PLAT199 ALERT 1 G](#) Check the Reported \_cell\_measurement\_temperature  
293 K  
[PLAT200 ALERT 1 G](#) Check the Reported \_diffrn\_ambient\_temperature  
293 K  
[PLAT764 ALERT 4 G](#) Overcomplete CIF Bond List Detected (Rep/Expd) .  
1.12 Ratio  
[PLAT794 ALERT 5 G](#) Note: Tentative Bond Valency for Zn1 .....  
2.01  
[PLAT794 ALERT 5 G](#) Note: Tentative Bond Valency for Zn2 .....  
2.06

---

- 1 **ALERT level A** = In general: serious problem
- 0 **ALERT level B** = Potentially serious problem
- 9 **ALERT level C** = Check and explain
- 7 **ALERT level G** = General alerts; check

3 ALERT type 1 CIF construction/syntax error, inconsistent or missing data

8 ALERT type 2 Indicator that the structure model may be wrong or deficient

1 ALERT type 3 Indicator that the structure quality may be low

3 ALERT type 4 Improvement, methodology, query or suggestion

2 ALERT type 5 Informative message, check
